# Supplementary material
Source: PubMed Central journal article supplement (PMC3551575)
Supplement: NIHMS423249-supplement-Supp__info.pdf [file NIHMS423249-supplement-Supp__info.pdf]

## Supplemental Data 1

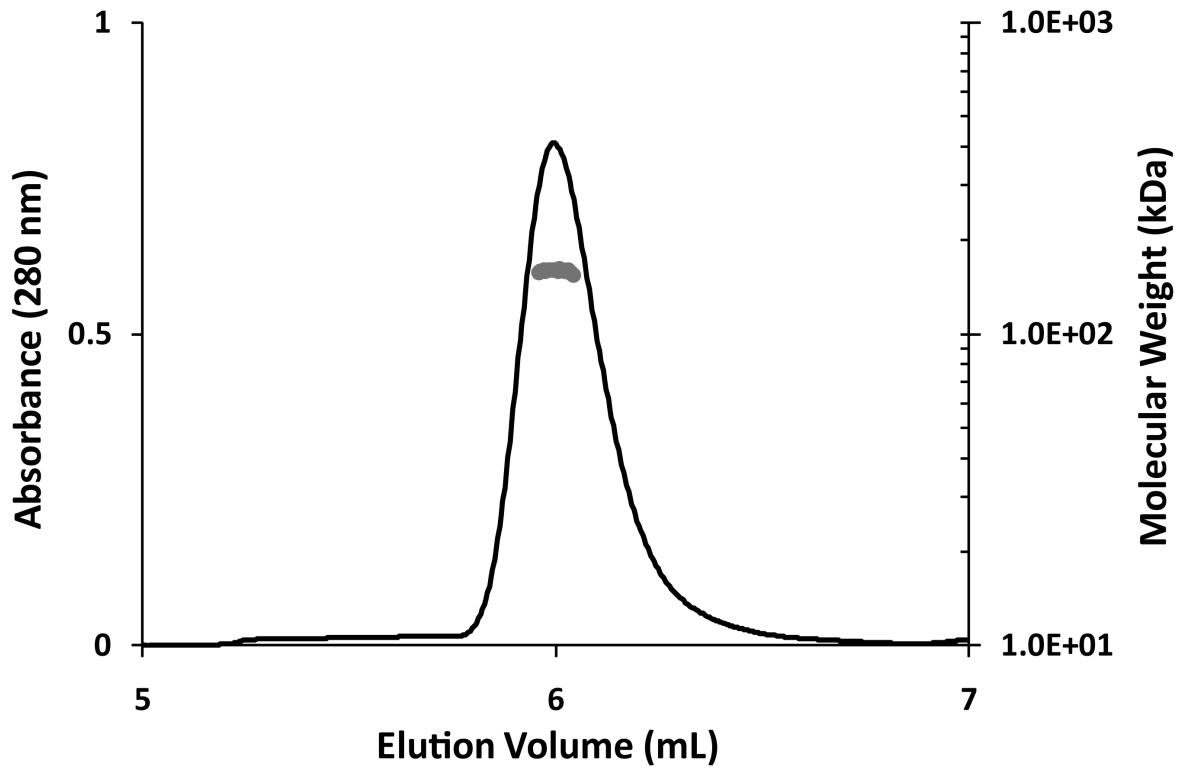

**Multi-angle laser light-scattering elution profile of FurX.** Elution profile is shown as molecular weight and absorbance *versus* elution time. The *thin* black lines represent changes in absorbance at 280 nm. The *thick red* lines indicate calculated molecular masses by the multiangle laser light-scattering pattern.

Supplemental Data2.

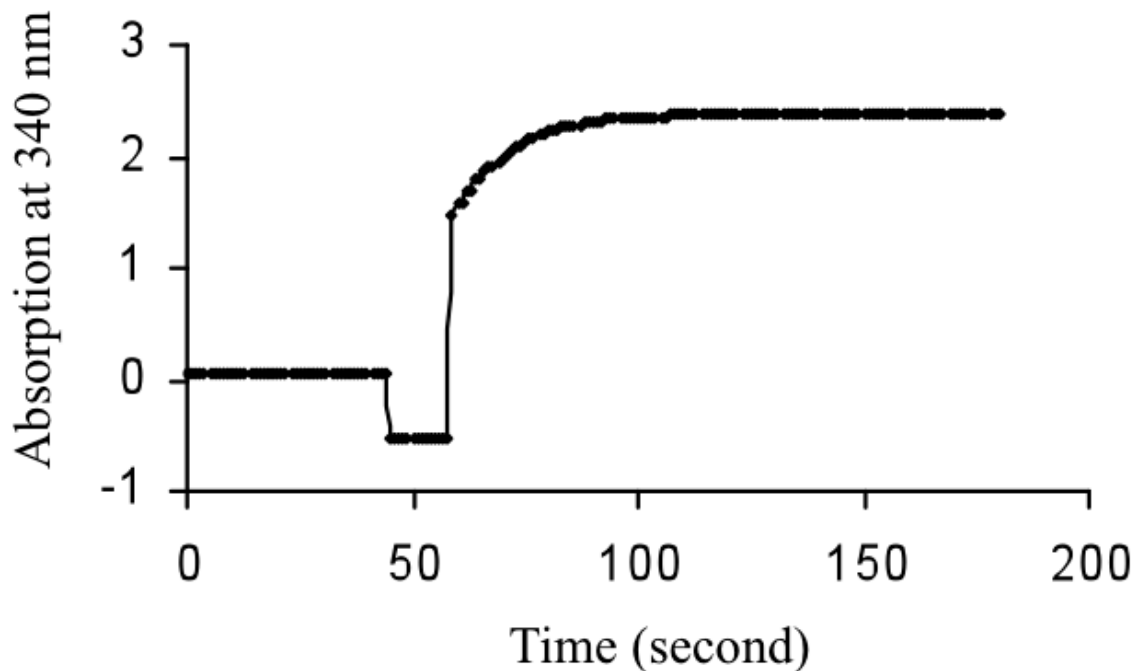

***FurX catalyzed isopropanol-dependent reduction  $NAD^+$***  - The reaction was performed in 1 ml of the crystallization solution containing 10 mM Tris buffer (pH 8), 1 M  $(NH_4)_2SO_4$ , 100 mM NaCl, 2.5% isopropanol, and 400  $\mu$ M  $NAD^+$ . The reaction was monitored for NADH production at 340 nm for 45 seconds without enzyme. Then, the sample was removed from the spectrophotometer, and 250  $\mu$ g of FurX was added in 10  $\mu$ l of volume. The sample was mixed and placed back to the spectrophotometer for continuously monitoring of NADH production. Significant reduction occurred during mixing and the reaction reached to an equilibrium within another 50 seconds of incubation. Kinetic analysis for isopropanol-dependent reduction of  $NAD^+$  were done as reported for ethanol-dependent reduction of  $NAD^+$  (3). The  $K_m$  values for isopropanol and  $NAD^+$  were  $14.6 \pm 4.2$  mM and  $0.54 \pm 0.10$  mM, respectively. The  $k_{cat}$  was  $5.1 \pm 0.3$  s<sup>-1</sup>.

### Supplemental Data3

|      | β1<br>(4-9)                                                   | β2<br>(18-23) | β3<br>(32-40) |    |
|------|---------------------------------------------------------------|---------------|---------------|----|
| FurX | -----MPAMMKAAVVRAFGAPLTIDEVVPPQPGPGQVQVKIEAS                  |               |               | 39 |
| 1LLU | -----MTLPQTMKAAVVHAYGAPLRIEEVKVPPLPGPGQVLVKIEAS               |               |               | 41 |
| 3MEQ | MAHHHHHHMGTLEAQTQGGPSMAKTMKAAVVRAFGKPLTIDEVPIPPQPGPGQIQVAIQAS |               |               | 60 |
| 1RJW | -----MKAAVVEQFKEPLKIKEVEKPTISYGEVLVRIKAC                      |               |               | 35 |
| 2HCY | -----SIPETQKGVIFYESHGKLEYKDI PVPKPKANELLINVKYS                |               |               | 40 |

  

|      | α1<br>(43-50)                                                 | β4<br>(67-74) | β5<br>(84-89) |     |
|------|---------------------------------------------------------------|---------------|---------------|-----|
| FurX | GVCHTDLHAAAGDWPVKPTLPFIPGHEGVGYVSAVGSVSRVKEGDRVGVWLYSACGYC    |               |               | 99  |
| 1LLU | GVCHTDLHAAAGDWPVKPPLPFIPGHEGVGYVAAVGSVTRVKEGDRVGIWLYTACGCC    |               |               | 101 |
| 3MEQ | GVCHTDLHAAAGDWPVKPNPPFIPGHEGVGFVSAVGSVGHVKEGDRVGIWLYTACGHC    |               |               | 120 |
| 1RJW | GVCHTDLHAAAGDWPVKPKLPLIPGHEGVGIVEEVGPGVTHLKVGDVGIWLYSACGHC    |               |               | 95  |
| 2HCY | GVCHTDLHAWHGDWPLPVKLLPLVGGHEGAGVVVGMGENVKGWKIGDYAGIKWLNGSCMAC |               |               | 100 |

  

|      | α2<br>(100-104)                                               | α3<br>(107-109) | β6<br>(127-130) | α4<br>(144-164) |     |
|------|---------------------------------------------------------------|-----------------|-----------------|-----------------|-----|
| FurX | EHCLQGWETLCEKQONTGYSVNGGYGEYVVADPNYVGLLPDKVGFVEIAPILCAGVTIYK  |                 |                 |                 | 159 |
| 1LLU | EHCLTGWETLCESEQONTGYSVNGGYAEYVADPNYVGLPKNVEFAEIAPILCAGVTIYK   |                 |                 |                 | 161 |
| 3MEQ | RHCLGGWETLCEEQLNTGYSVNGGYAEYVADPNFVGHLPKNIDFNEIAPVLCAGVTIYK   |                 |                 |                 | 180 |
| 1RJW | DYCLSGQETLCEHQKNAGYSVDGGYAEYCRAADYVVKIPDNLSFEAAPIFCAGVTIYK    |                 |                 |                 | 155 |
| 2HCY | EYCELGNESNC PHADLSGYTHDGSFQQYATADAVQAAHIPQGTDLAQVAPILCAGITVYK |                 |                 |                 | 160 |

  

|      | βA<br>(171-175)                                              | αA<br>(180-191) | βB<br>(194-199) | αB<br>(202-211) | βC<br>(215-218) |     |
|------|--------------------------------------------------------------|-----------------|-----------------|-----------------|-----------------|-----|
| FurX | GLKVTDRPGQWVVISG-IGGLGHVAVQYARAMGLRVAAVDIDDAKLNLARRLGAEVAVN  |                 |                 |                 |                 | 218 |
| 1LLU | GLKQTNARPGQWVAISG-IGGLGHVAVQYARAMGLHVAADIDDAKLELARKLGASLTVN  |                 |                 |                 |                 | 220 |
| 3MEQ | GLKVTDTKPGDWVVISG-IGGLGHMAVQYARAMGLNVAAVDIDDRKLDLARRLGATVTVN |                 |                 |                 |                 | 239 |
| 1RJW | ALKVGTGAKPGEWVAIYG-IGGLGHVAVQYAKAMGLNVAVDIGEKLELAKELGADLVVN  |                 |                 |                 |                 | 214 |
| 2HCY | ALKSANLMAGHWVAISGAAGGLGSLAVQYAKAMGYRVLIDGGEGKEELFRSIGGEVFID  |                 |                 |                 |                 | 220 |

  

|      | αC<br>(224-232)                                               | βD<br>(237-240) | αD<br>(245-254) | βE<br>(260-263) | βF<br>(270-273) |     |
|------|---------------------------------------------------------------|-----------------|-----------------|-----------------|-----------------|-----|
| FurX | AR-DTDPAAWLQKEIGG-AHGVLVTAVSPKAFSQAIGMVRGGTIALNGLPP-GDFGTPPI  |                 |                 |                 |                 | 275 |
| 1LLU | AR-QEDPVEAIQRDIGG-AHGVLVTAVSNSAFGQAIGMARRGGTIALVGLPP-GDFPPTPI |                 |                 |                 |                 | 277 |
| 3MEQ | AKTVADPAAYIRKETDGGAQGVLTAVSPKAFEQALGMVARGGTVSLNGLPP-GDFPLSI   |                 |                 |                 |                 | 298 |
| 1RJW | PL-KEDAAKFMKEKVG-GVHAAVVTAVSKPAFQSAYNSTRGGACVLVGLPP-EEMPPIPI  |                 |                 |                 |                 | 271 |
| 2HCY | FTKEKDIVGAVLKATDGGAGHVINVSVEAAIEASTRYVRANGTTVLVGMFAGAKCCSDV   |                 |                 |                 |                 | 280 |

  

|      | αE<br>(275-281)                                                | βG<br>(284-287) | α5<br>(293-305) | β7<br>(312-315) | α6<br>(320-329) |     |
|------|----------------------------------------------------------------|-----------------|-----------------|-----------------|-----------------|-----|
| FurX | FDVVLKGITIRGSIVGTRSDLQESLDFAAHGDVKATVSTAKLDDVNDVFGRLREGKVEGR   |                 |                 |                 |                 | 335 |
| 1LLU | FDVVLKGLHIAGSIVGTRADLQEQALDFAGEGLVKATIHGPKLDDINQILDQMRAGQIEGR  |                 |                 |                 |                 | 337 |
| 3MEQ | FNMVLNGVTVRGSIVGTRLDLQESLDFAAADGKVKATIQTGKLEDINAI FDDMRQGNIEGR |                 |                 |                 |                 | 358 |
| 1RJW | FDTVLNGIKIIGSIVGTRKDLQEQALQFAAEGKVKTIIEVQPLEKINEVFDRLMLKGQINGR |                 |                 |                 |                 | 331 |
| 2HCY | FNQVVKISISIVGSYVGNRADTREALDFFARGLVKSPIKVVGLSTLPEIYEKMEKQIVGR   |                 |                 |                 |                 | 340 |

  

|      | β8<br>(335-339) |     |
|------|-----------------|-----|
| FurX | VVLDFSR-        | 342 |
| 1LLU | IVLEM---        | 342 |
| 3MEQ | IVMDLTQ-        | 365 |
| 1RJW | VVLTLEDK        | 339 |
| 2HCY | YVVDTSK-        | 347 |

**Multiple sequence alignment between FurX and other tetrameric ADHs of high similarity.**

The secondary structures of the FurX are indicated on top of the corresponding residues. The eleven residues constituting the substrate-binding pocket are shown with a yellow (one subunit) and a violet (the other subunit) color respectively. The catalytic Zn<sup>2+</sup>-coordinating residues, Cys42, His65 and Cys152, are indicated with a blue color and the four cysteine residues, Cys96, Cys99, Cys102 and Cys110, which coordinate the structural Zn<sup>2+</sup>, are indicated with a red color. His47 and Asp52, which are involved in a proton shuttling system together with Thr44, are indicated with a green color. The GxGxxG nucleotide-binding motif is depicted by red dots on top of the glycine residues. 1LLU: ADH from *Pseudomonas aeruginosa*, 3MEQ: ADH from *Brucella melitensis*, 1RJW: MDR from *Bacillus stearothermophilus*, 2HCY: ADH from *Saccharomyces cerevisiae*.

## Supplemental Data4

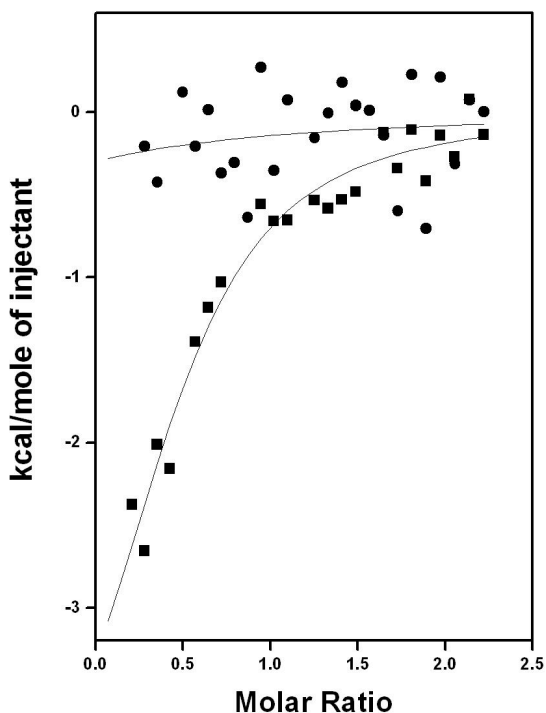

***Isothermal Titration Calorimetry (ITC)*** - The interactions between FurX and furfural (*filled square*), furfuryl alcohol (*filled circle*) were measured using a MicroCal VP-ITC instrument at 25°C following standard procedures. Titration buffer was 20 mM sodium phosphate buffer (pH 7.5) containing 150 mM NaCl. FurX enzyme at 0.01 mM was titrated with 0.1 mM ligands. The solutions were degassed prior to titration. Each titration experiment was performed with 29 injections of 10  $\mu$ L at 300-second equilibration intervals. Heats of dilution for an individual ligand were determined by titrating ligand into the same buffer without protein and were used to correct the protein titration. Data were fit to a single-site binding model by nonlinear least squares regression with the Origin software package. The fit of data yields the binding affinity, enthalpy change, entropy change, and binding stoichiometry for the titration.
